# Supplementary material for: Genetic Polymorphism at 15 Codons of the Prion Protein Gene in 156 Goats from Romania
Source: MDPI journal article supplement (doi:10.3390/genes13081316), 2022-07-23
Supplement: s1 [file s1]

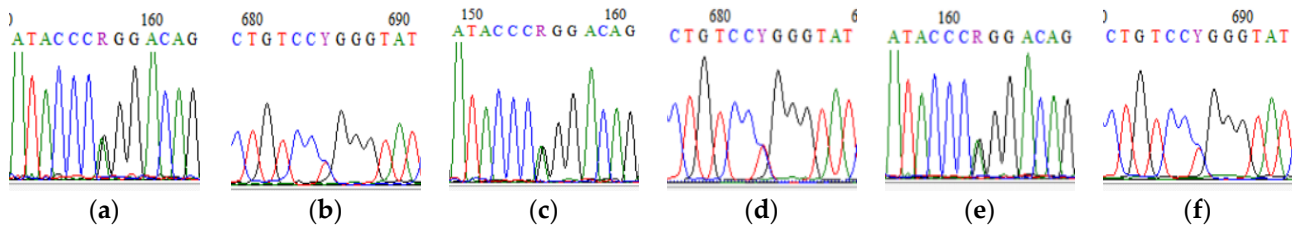

**Figure S2.** Electropherograms of three goats with silent mutations. (a) codon W34W in the 5' UTR with adenine silent mutation (GenBank ID: ON015426); (b) codon W34W in the 3' UTR with thymine silent mutation (GenBank ID: ON015426); (c) codon W34W in the 5' UTR with adenine silent mutation (GenBank ID: ON015429); (d) codon W34W in the 3' UTR with thymine silent mutation (GenBank ID: ON015429); (e) codon W34W in the 5' UTR with adenine silent mutation (GenBank ID: ON015440); (f) codon W34W in the 3' UTR with thymine silent mutation (GenBank ID: ON015440). The colours (green: adenine; blue: cytosine; black: guanine; red: thymine) indicate individual bases of DNA sequence using an automatic sequencer ABI PRISM 3130 (Applied Biosystems).
