# Supplementary material for: Genetic Polymorphism at 15 Codons of the Prion Protein Gene in 156 Goats from Romania
Source: MDPI journal article supplement (doi:10.3390/genes13081316), 2022-07-23
Supplement: s1 [file s1]

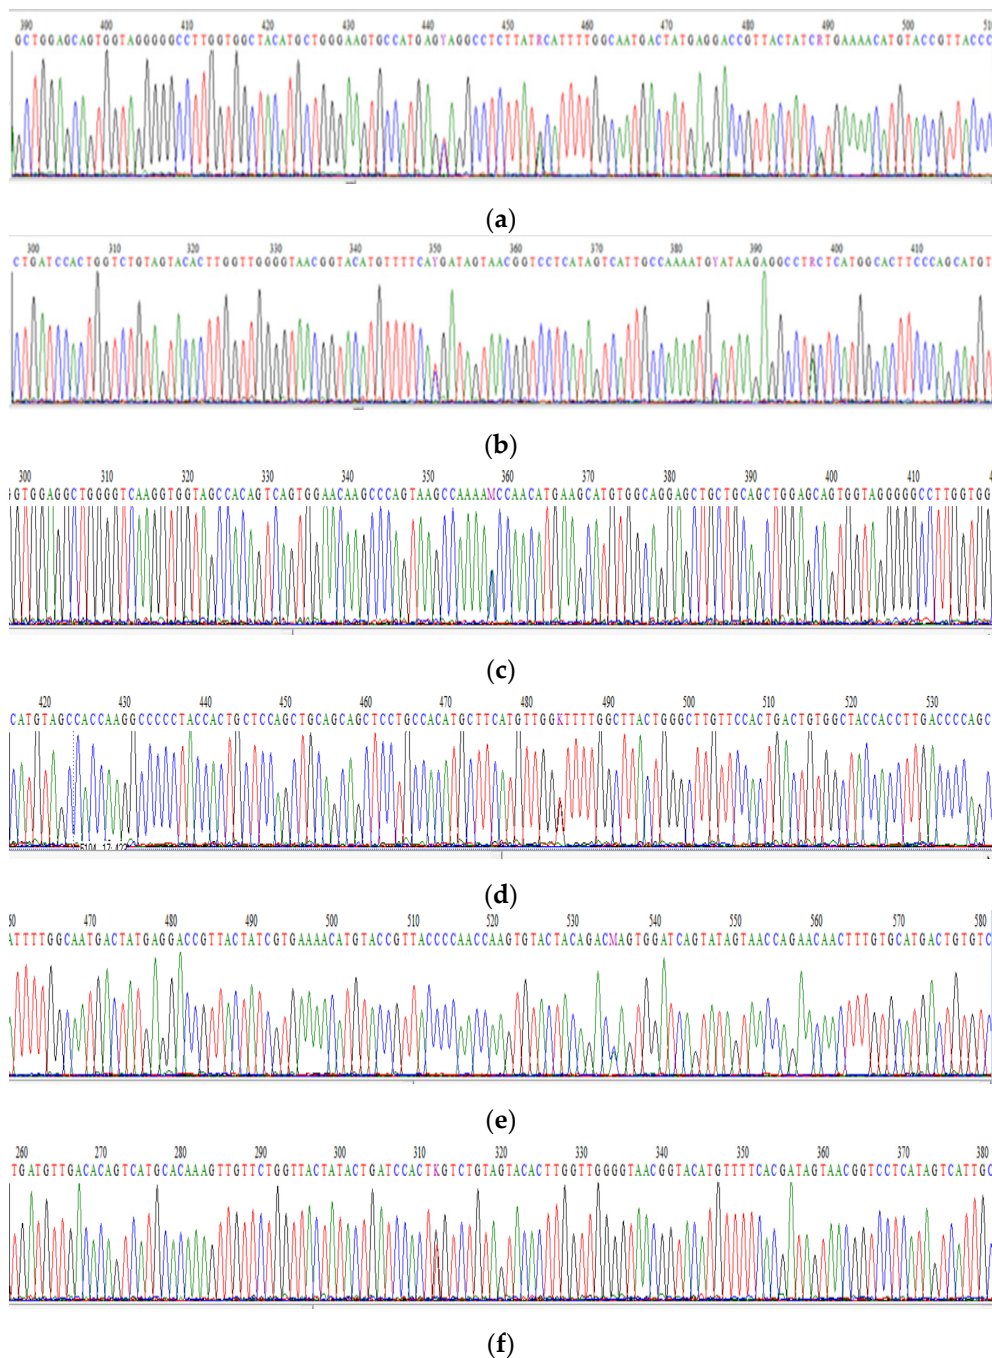

**Figure 1.** Electropherograms showing the polymorphism of the prion protein gene (*PRNP*) identified in Romanian goats by using BioEdit Sequence Alignment Editor (ver. 7.2.5). (a) *PRNP* polymorphism on forward at codons I142M (G C/T A), H154R (T A/G C), R211R (C A/G T), French Alpine (GenBank ID: ON084837); (b) *PRNP* polymorphism on reverse at codons I142M (G G/A T), H154R (A T/C G), R211R (G T/C A), French Alpine (GenBank ID: ON084837); (c) *PRNP* polymorphism on forward at codon P110S (A C/A C), Carpathian (GenBank ID: ON417730); (d) *PRNP* polymorphism on reverse at codon P110S (G G/T T), Carpathian (GenBank ID: ON417730); (e) *PRNP* polymorphism on forward at codon Q168Q (C A/C A), Banat's White (GenBank ID: ON084819); (f) *PRNP* polymorphism on reverse at codon Q168Q (T G/T G), Banat's White (GenBank ID: ON084819). The colours (green: adenine; blue: cytosine; black: guanine; red: thymine) indicate individual bases of DNA sequence using an automatic sequencer ABI PRISM 3130 (Applied Biosystems).
