# Supplementary material for: Genetic Polymorphism at 15 Codons of the Prion Protein Gene in 156 Goats from Romania
Source: MDPI journal article supplement (doi:10.3390/genes13081316), 2022-07-23
Supplement: s1 [file s1]

**Table S1.** Goats with silent mutations and homo- or heterozygous polymorphisms at 15 codons of PRNP gene

| #   | Code number | Breed      | Sex | Age (years) | Silent mutations | 37  | 102 | 110 | 127 | 142 | 143 | 146 | 151 | 154 | 168 | 173 | 211 | 218 | 222 | 240 | GenBank ID |
|-----|-------------|------------|-----|-------------|------------------|-----|-----|-----|-----|-----|-----|-----|-----|-----|-----|-----|-----|-----|-----|-----|------------|
| 1.  | 1C          | Carpathian | M   | 4           | Yes              | G/G | W/W | T/T | G/G | I/I | H/H | N/N | R/R | R/R | P/P | S/S | R/R | I/I | Q/Q | P/P | OM988074   |
| 2.  | 2C          | Carpathian | M   | 4           |                  | G/G | W/W | T/T | G/G | I/I | H/H | N/N | R/R | R/R | P/P | S/S | R/R | I/I | Q/Q | P/P | OM988076   |
| 3.  | 3C          | Carpathian | M   | 4           | Yes              | G/G | W/W | T/T | G/G | I/I | H/H | N/N | R/R | R/R | P/P | S/S | R/R | I/I | Q/Q | S/P | ON417708   |
| 4.  | 4C          | Carpathian | M   | 4           | Yes              | G/G | W/W | T/T | G/G | I/I | H/H | N/N | R/R | R/R | P/P | S/S | R/R | I/I | Q/Q | S/P | ON417709   |
| 5.  | 5C          | Carpathian | M   | 4           |                  | G/G | W/W | T/T | G/G | I/I | H/H | N/N | R/R | R/R | P/P | S/S | R/R | I/I | Q/Q | P/P | ON417710   |
| 6.  | 6C          | Carpathian | M   | 4           | Yes              | G/G | W/W | T/T | G/G | I/I | H/H | N/N | R/R | R/R | P/P | S/S | R/R | I/I | Q/Q | S/S | ON417711   |
| 7.  | 7C          | Carpathian | M   | 4           |                  | G/G | W/W | T/T | G/G | I/I | H/H | N/N | R/R | R/R | P/P | S/S | R/R | I/I | Q/Q | S/P | ON417712   |
| 8.  | 8C          | Carpathian | M   | 4           |                  | G/G | W/W | T/T | G/G | I/I | H/H | N/N | R/R | R/R | P/P | S/S | R/R | I/I | Q/Q | P/P | ON417713   |
| 9.  | 9C          | Carpathian | M   | 4           |                  | G/G | W/W | T/T | G/G | I/I | H/H | N/N | R/R | R/R | P/P | S/S | R/R | I/I | Q/Q | P/P | ON417714   |
| 10. | 10C         | Carpathian | F   | 5           | Yes              | G/G | W/W | T/T | G/G | I/I | H/H | N/N | R/R | R/R | P/P | S/S | R/R | I/I | Q/Q | P/S | OM988073   |
| 11. | 12C         | Carpathian | F   | 4           | Yes              | G/G | W/W | T/T | G/G | I/I | H/H | N/N | R/R | R/R | P/P | S/S | R/R | I/I | Q/Q | S/P | ON417715   |
| 12. | 13C         | Carpathian | F   | 7           | Yes              | G/G | W/W | T/T | G/G | I/I | H/H | N/N | R/R | R/R | P/P | S/S | R/R | I/I | Q/Q | P/P | ON417716   |
| 13. | 14C         | Carpathian | F   | 7           | Yes              | G/G | W/W | T/T | G/G | I/I | H/H | N/N | R/R | R/R | P/P | S/S | R/R | I/I | Q/Q | S/S | ON417717   |
| 14. | 15C         | Carpathian | F   | 9           | Yes              | G/G | W/W | T/T | G/G | I/I | H/H | N/N | R/R | R/R | P/P | S/S | R/R | I/I | Q/Q | P/P | ON417718   |
| 15. | 16C         | Carpathian | F   | 4           |                  | G/G | W/W | T/T | G/G | I/I | H/H | N/N | R/R | R/R | P/P | S/S | R/R | I/I | Q/Q | P/P | ON417719   |
| 16. | 17C         | Carpathian | F   | 7           |                  | G/G | W/W | T/T | G/G | I/I | H/H | N/N | R/R | R/R | P/P | S/S | R/R | I/I | Q/Q | P/P | ON417720   |
| 17. | 18C         | Carpathian | F   | 4           | Yes              | G/G | W/W | T/T | G/G | I/I | H/H | N/N | R/R | R/R | P/P | S/S | R/R | I/I | Q/Q | P/P | ON417721   |
| 18. | 19C         | Carpathian | F   | 4           | Yes              | G/G | W/W | T/T | G/G | I/I | H/H | N/N | R/R | R/R | P/P | S/S | R/R | I/I | Q/Q | P/P | ON417722   |
| 19. | 20C         | Carpathian | F   | 7           | Yes              | G/G | W/W | T/T | G/G | I/I | H/H | N/N | R/R | R/R | P/P | S/S | R/R | I/I | Q/Q | P/P | ON417723   |
| 20. | 21C         | Carpathian | F   | 5           |                  | G/G | W/W | T/T | G/G | I/I | H/H | N/N | R/R | R/R | P/P | S/S | R/R | I/I | Q/Q | P/P | ON417724   |
| 21. | 22C         | Carpathian | F   | 7           | Yes              | G/G | W/W | T/T | G/G | I/I | H/H | N/N | R/R | R/R | P/P | S/S | R/R | I/I | Q/Q | S/P | ON417725   |
| 22. | 23C         | Carpathian | F   | 3           |                  | G/G | W/W | T/T | G/G | I/I | H/H | N/N | R/R | R/R | P/P | S/S | R/R | I/I | Q/Q | P/P | ON417726   |
| 23. | 24C         | Carpathian | F   | 7           | Yes              | G/G | W/W | T/T | G/G | I/I | H/H | N/N | R/R | R/R | P/P | S/S | R/R | I/I | K/K | S/S | ON417727   |
| 24. | 25C         | Carpathian | F   | 6           |                  | G/G | W/W | T/T | G/G | I/I | H/H | N/N | R/R | R/R | P/P | S/S | R/R | I/I | Q/Q | P/P | ON417728   |
| 25. | 26C         | Carpathian | M   | 4           | Yes              | G/G | W/W | P/P | G/G | I/I | H/H | N/N | R/R | R/R | P/P | S/S | R/R | I/I | Q/Q | S/P | ON417729   |
| 26. | 27C         | Carpathian | M   | 4           | Yes              | G/G | W/W | P/S | G/G | I/I | H/H | N/N | R/R | R/R | P/P | S/S | R/R | I/I | Q/Q | S/S | ON417730   |

| #   | Code number | Breed         | Sex | Age (years) | Silent mutations | 37  | 102 | 110 | 127 | 142 | 143 | 146 | 151 | 154 | 168 | 173 | 211 | 218 | 222 | 240 | GenBank ID |
|-----|-------------|---------------|-----|-------------|------------------|-----|-----|-----|-----|-----|-----|-----|-----|-----|-----|-----|-----|-----|-----|-----|------------|
| 27. | 28C         | Carpathian    | M   | 4           | Yes              | G/G | W/W | T/T | G/G | I/I | H/H | N/N | R/R | R/R | P/P | S/S | R/R | I/I | K/K | S/P | ON417731   |
| 28. | 29C         | Carpathian    | M   | 4           |                  | G/G | W/W | T/T | G/G | I/I | H/H | N/N | R/R | R/R | P/P | S/S | R/R | I/I | Q/Q | P/P | ON453970   |
| 29. | 30C         | Carpathian    | M   | 4           |                  | G/G | W/W | T/T | G/G | I/I | H/H | N/N | R/R | R/R | P/P | S/S | R/R | I/I | Q/Q | P/P | ON453971   |
| 30. | 31C         | Carpathian    | F   | 5           | Yes              | G/G | W/W | T/T | G/G | I/I | H/H | N/N | R/R | R/R | P/P | S/S | R/R | I/I | Q/Q | S/S | ON453972   |
| 31. | 32C         | Carpathian    | F   | 3           | Yes              | G/G | W/W | T/T | G/G | I/I | H/H | N/N | R/R | R/R | P/P | S/S | R/R | I/I | Q/Q | S/P | ON453973   |
| 32. | 33C         | Carpathian    | F   | 4           | Yes              | G/G | W/W | P/T | G/G | I/I | H/H | N/N | R/R | R/R | P/P | S/S | R/R | I/I | Q/Q | S/P | ON453974   |
| 33. | 34C         | Carpathian    | F   | 4           | Yes              | G/G | W/W | T/T | G/G | I/I | H/H | N/N | R/R | R/R | P/P | S/S | R/R | I/I | Q/Q | S/P | ON453975   |
| 34. | 35C         | Carpathian    | F   | 3           | Yes              | G/G | W/W | T/T | G/G | I/I | H/H | N/N | R/R | R/R | P/P | S/S | R/R | I/I | Q/Q | S/P | ON453976   |
| 35. | 36C         | Carpathian    | F   | 3           | Yes              | G/G | W/W | T/T | G/G | I/I | H/H | N/N | R/R | R/R | P/P | S/S | R/R | I/I | Q/Q | S/P | ON453977   |
| 36. | 37C         | Carpathian    | F   | 5           |                  | G/G | W/W | T/T | G/G | I/I | H/H | N/N | R/R | R/R | P/P | S/S | R/R | I/I | Q/Q | P/P | ON453978   |
| 37. | 38C         | Carpathian    | F   | 3           |                  | G/G | W/W | T/T | G/G | I/I | H/H | N/N | R/R | R/R | P/P | S/S | R/R | I/I | Q/Q | S/S | ON453979   |
| 38. | 39C         | Carpathian    | F   | 3           | Yes              | G/G | W/W | T/T | G/G | I/I | H/H | N/N | R/R | R/R | P/P | S/S | R/R | I/I | Q/Q | S/S | ON453980   |
| 39. | 40C         | Carpathian    | F   | 3           | Yes              | G/G | W/W | T/T | G/G | I/I | H/H | N/N | R/R | R/R | P/P | S/S | R/R | I/I | Q/Q | S/P | ON453981   |
| 40. | 41C         | Carpathian    | F   | 3           |                  | G/G | W/W | T/T | G/G | I/I | H/H | N/N | R/R | R/R | P/P | S/S | R/R | I/I | Q/Q | P/P | ON453982   |
| 41. | 42C         | Carpathian    | F   | 5           | Yes              | G/G | W/W | T/T | G/G | I/I | H/H | N/N | R/R | R/R | P/P | S/S | R/R | I/I | Q/Q | S/P | ON453983   |
| 42. | 43C         | Carpathian    | F   | 4           |                  | G/G | W/W | T/T | G/G | I/I | H/H | N/N | R/R | R/R | P/P | S/S | R/R | I/I | Q/Q | P/P | ON453984   |
| 43. | 44C         | Carpathian    | F   | 3           |                  | G/G | W/W | T/T | G/G | I/I | H/H | N/N | R/R | R/R | P/P | S/S | R/R | I/I | Q/Q | S/P | ON453985   |
| 44. | 46C         | Carpathian    | F   | 4           | Yes              | G/G | W/W | T/T | G/G | I/I | H/H | N/N | R/R | R/R | P/P | S/S | R/R | I/I | Q/Q | S/P | ON453986   |
| 45. | 47C         | Carpathian    | F   | 3           | Yes              | G/G | W/W | T/T | G/G | I/I | H/H | N/N | R/R | R/R | P/P | S/S | R/R | I/I | Q/Q | P/P | ON453987   |
| 46. | 48C         | Carpathian    | F   | 3           | Yes              | G/G | W/W | T/T | G/G | I/I | H/H | N/N | R/R | R/R | P/P | S/S | R/R | I/I | K/K | S/P | ON453988   |
| 47. | 49C         | Carpathian    | F   | 5           |                  | G/G | W/W | T/T | G/G | I/I | H/H | N/N | R/R | R/R | P/P | S/S | R/R | I/I | Q/Q | P/P | ON453989   |
| 48. | 50C         | Carpathian    | F   | 3           | Yes              | G/G | W/W | T/T | G/G | I/I | H/H | N/N | R/R | R/R | P/P | S/S | R/R | I/I | Q/Q | S/P | ON453990   |
| 49. | 51C         | Carpathian    | F   | 6           | Yes              | G/G | W/W | T/T | G/G | I/I | H/H | N/N | R/R | R/R | P/P | S/S | R/R | I/I | Q/Q | S/S | ON453991   |
| 50. | 52C         | Carpathian    | F   | 3           | Yes              | G/G | W/W | T/T | G/G | T/I | H/H | N/N | R/R | R/R | P/P | S/S | R/R | I/I | Q/Q | S/P | ON453992   |
| 51. | IV-POZ      | Banat's White | F   | 5           |                  | G/G | W/W | T/T | G/G | I/I | H/H | N/N | R/R | R/R | P/P | S/S | R/R | I/I | Q/Q | S/S | ON015441   |
| 52. | 1 AB        | Banat's White | F   | 1           |                  | G/G | W/W | T/T | G/G | I/I | H/H | N/N | R/R | R/R | P/P | S/S | R/R | I/I | Q/Q | P/P | ON149623   |

| #   | Code number | Breed         | Sex | Age (years) | Silent mutations | 37  | 102 | 110 | 127 | 142 | 143 | 146 | 151 | 154 | 168 | 173 | 211 | 218 | 222 | 240 | GenBank ID |
|-----|-------------|---------------|-----|-------------|------------------|-----|-----|-----|-----|-----|-----|-----|-----|-----|-----|-----|-----|-----|-----|-----|------------|
| 53. | 2 AB        | Banat's White | F   | 10          |                  | G/G | W/W | T/T | G/G | I/I | H/H | N/N | R/R | R/R | P/P | S/S | R/R | I/I | Q/Q | P/P | ON084850   |
| 54. | 3 AB        | Banat's White | F   | 2           |                  | G/G | W/W | T/T | G/G | I/I | H/H | N/N | R/R | R/R | P/P | S/S | R/R | I/I | Q/Q | P/P | ON084851   |
| 55. | 4 AB        | Banat's White | F   | 5           |                  | G/G | W/W | T/T | G/G | I/I | H/H | N/N | R/R | R/R | P/P | S/S | R/R | I/I | Q/Q | P/P | ON084852   |
| 56. | 5 AB        | Banat's White | F   | 7           | Yes              | G/G | W/W | T/T | G/G | I/I | H/H | N/N | R/R | R/R | P/P | S/S | R/R | I/I | Q/Q | S/P | ON084853   |
| 57. | 6 AB        | Banat's White | F   | 9           |                  | G/G | W/W | T/T | G/G | I/I | H/H | N/N | R/R | R/R | P/P | S/S | R/R | I/I | Q/Q | P/P | ON084854   |
| 58. | 7 AB        | Banat's White | M   | 4           | Yes              | G/G | W/W | T/T | G/G | I/I | H/H | N/N | R/R | R/R | P/P | S/S | Q/R | I/I | Q/Q | P/P | ON084855   |
| 59. | 8 AB        | Banat's White | F   | 5           |                  | G/G | W/W | T/T | G/G | I/I | H/H | N/N | R/R | R/R | P/P | S/S | R/R | I/I | Q/Q | P/P | ON084856   |
| 60. | 9 AB        | Banat's White | F   | 5           | Yes              | G/G | W/W | T/T | G/G | I/I | H/H | N/N | R/R | R/R | P/P | S/S | R/R | I/I | Q/Q | P/P | ON084857   |
| 61. | 10 AB       | Banat's White | F   | 5           | Yes              | G/G | W/W | T/T | G/G | I/I | H/H | N/N | R/R | R/R | P/P | S/S | R/R | I/I | Q/Q | P/S | ON084858   |
| 62. | 11 AB       | Banat's White | F   | 10          | Yes              | G/G | W/W | T/T | G/G | I/I | P/P | N/N | R/R | R/R | P/P | S/S | R/R | I/I | Q/Q | P/S | ON045072   |
| 63. | 12 AB       | Banat's White | F   | 5           |                  | G/G | W/W | T/T | G/G | I/I | R/R | N/N | R/R | R/R | P/P | S/S | R/R | I/I | Q/Q | P/P | ON084820   |
| 64. | 13 AB       | Banat's White | F   | 2           | Yes              | G/G | W/W | T/T | G/G | I/I | H/H | N/N | R/R | R/R | Q/Q | S/S | R/R | I/I | Q/Q | P/P | ON084819   |
| 65. | 14 AB       | Banat's White | F   | 10          |                  | G/G | W/W | T/T | G/G | I/I | P/P | N/N | R/R | R/R | P/P | S/S | R/R | I/I | Q/Q | P/P | ON084818   |
| 66. | 15 AB       | Banat's White | F   | 9           | Yes              | G/G | W/W | T/T | G/G | I/I | H/H | N/N | R/R | R/R | P/P | S/S | R/R | I/I | Q/Q | P/P | ON149624   |
| 67. | 16 AB       | Banat's White | M   | 5           |                  | G/G | W/W | T/T | G/G | I/I | H/H | N/N | R/R | R/R | P/P | S/S | R/R | I/I | Q/Q | P/P | ON149625   |
| 68. | 17 AB       | Banat's White | F   | 2           |                  | G/G | W/W | T/T | G/G | I/I | H/H | N/N | R/R | R/R | P/P | S/S | R/R | I/I | Q/Q | P/S | ON149626   |

| #   | Code number | Breed         | Sex | Age (years) | Silent mutations | 37  | 102 | 110 | 127 | 142 | 143 | 146 | 151 | 154 | 168 | 173 | 211 | 218 | 222 | 240 | GenBank ID |
|-----|-------------|---------------|-----|-------------|------------------|-----|-----|-----|-----|-----|-----|-----|-----|-----|-----|-----|-----|-----|-----|-----|------------|
| 69. | 18 AB       | Banat's White | F   | 7           |                  | G/G | W/W | T/T | G/G | I/I | H/H | N/N | R/R | R/R | P/P | S/S | R/R | I/I | Q/Q | P/P | ON149627   |
| 70. | 19 AB       | Banat's White | F   | 2           |                  | G/G | W/W | T/T | G/G | I/I | H/H | N/N | R/R | R/R | P/P | S/S | R/R | I/I | Q/Q | P/P | ON149628   |
| 71. | 20 AB       | Banat's White | F   | 7           |                  | G/G | W/W | T/T | G/G | I/I | H/H | N/N | R/R | R/R | P/P | S/S | R/R | I/I | Q/Q | P/P | ON149629   |
| 72. | 21 AB       | Banat's White | F   | 5           |                  | G/G | W/W | T/T | G/S | I/I | H/H | N/N | R/R | R/R | P/P | S/S | R/R | I/I | Q/Q | P/P | ON149630   |
| 73. | 22 AB       | Banat's White | F   | 7           | Yes              | G/G | W/W | T/T | G/G | I/I | H/H | N/N | R/R | R/R | P/P | S/S | R/R | I/I | K/K | P/P | ON149631   |
| 74. | 23 AB       | Banat's White | F   | 1           |                  | G/G | W/W | T/T | G/G | I/I | H/H | N/N | R/R | R/R | P/P | S/S | R/R | I/I | Q/Q | P/P | ON149632   |
| 75. | 24 AB       | Banat's White | F   | 10          |                  | G/G | W/W | T/T | G/G | I/I | H/H | N/N | R/R | R/R | P/P | S/S | R/R | I/I | Q/Q | P/P | ON149633   |
| 76. | 25 AB       | Banat's White | F   | 1           |                  | G/G | W/W | T/T | G/G | I/I | H/H | N/N | R/R | R/R | P/P | S/S | R/R | I/I | Q/Q | P/P | ON149634   |
| 77. | 26 AB       | Banat's White | F   | 2           |                  | G/G | W/W | T/T | G/G | I/I | R/R | N/N | R/R | R/R | Q/Q | S/S | R/R | I/I | Q/Q | P/P | ON149635   |
| 78. | 27 AB       | Banat's White | F   | 5           | Yes              | G/G | W/W | T/T | G/G | I/I | H/H | N/N | R/R | R/R | P/P | S/S | R/R | I/I | Q/Q | P/P | ON149636   |
| 79. | 28 AB       | Banat's White | F   | 9           | Yes              | G/G | W/W | T/T | G/G | I/I | H/H | N/N | R/R | R/R | P/P | S/S | R/R | I/I | Q/Q | P/P | ON149637   |
| 80. | 29 AB       | Banat's White | F   | 2           | Yes              | G/G | W/W | T/T | G/G | I/I | H/H | N/N | R/R | R/R | P/P | S/S | R/R | I/I | Q/Q | P/S | ON149638   |
| 81. | 30 AB       | Banat's White | F   | 1           |                  | G/G | W/W | T/T | G/G | I/I | H/H | N/N | R/R | R/R | P/P | S/S | R/R | I/I | Q/Q | P/P | ON149640   |
| 82. | 31 AB       | Banat's White | F   | 2           | Yes              | G/G | W/W | T/T | G/G | I/I | H/H | N/N | R/R | R/R | Q/Q | S/S | R/R | I/I | Q/Q | P/P | ON072522   |
| 83. | 32 AB       | Banat's White | F   | 10          | Yes              | G/G | W/W | T/T | G/G | I/I | H/H | N/N | R/R | R/R | P/P | S/S | R/R | I/I | Q/Q | P/P | ON149639   |
| 84. | 33 AB       | Banat's White | F   | 1           |                  | G/G | W/W | T/T | G/G | I/I | H/H | N/N | R/R | R/R | P/P | S/S | R/R | I/I | Q/Q | P/P | ON149641   |

| #    | Code number | Breed         | Sex | Age (years) | Silent mutations | 37  | 102 | 110 | 127 | 142 | 143 | 146 | 151 | 154 | 168 | 173 | 211 | 218 | 222 | 240 | GenBank ID |
|------|-------------|---------------|-----|-------------|------------------|-----|-----|-----|-----|-----|-----|-----|-----|-----|-----|-----|-----|-----|-----|-----|------------|
| 85.  | 34 AB       | Banat's White | F   | 2           |                  | G/G | W/W | T/T | G/G | I/I | H/H | N/N | R/R | R/R | P/P | S/S | R/R | I/I | Q/Q | P/P | ON149642   |
| 86.  | 35 AB       | Banat's White | F   | 10          |                  | G/G | W/W | T/T | G/G | I/I | H/H | N/N | R/R | R/R | P/P | S/S | R/R | I/I | Q/Q | P/P | ON149643   |
| 87.  | 36 AB       | Banat's White | F   | 2           |                  | G/G | W/W | T/T | G/G | I/I | H/H | N/N | R/R | R/R | P/P | S/S | R/R | I/I | Q/Q | P/P | ON149644   |
| 88.  | 37 AB       | Banat's White | F   | 2           | Yes              | G/G | W/W | T/T | G/G | I/I | H/H | N/N | R/R | R/R | P/P | S/S | R/R | I/I | Q/Q | P/P | ON149645   |
| 89.  | 38 AB       | Banat's White | M   | 5           | Yes              | G/G | W/W | T/T | G/G | I/I | H/H | N/N | R/R | R/R | P/P | S/S | R/R | I/I | K/K | P/P | ON149646   |
| 90.  | 39 AB       | Banat's White | F   | 2           |                  | G/G | W/W | T/T | G/G | I/I | H/H | N/N | R/R | R/R | P/P | S/S | R/R | I/I | Q/Q | P/P | ON149647   |
| 91.  | 40 AB       | Banat's White | F   | 7           | Yes              | G/G | W/W | T/T | G/G | I/I | H/H | N/N | R/R | R/R | Q/Q | S/S | R/R | I/I | K/K | P/P | ON149648   |
| 92.  | 41 AB       | Banat's White | F   | 7           | Yes              | G/G | W/W | T/T | G/G | I/I | H/H | N/N | R/R | R/R | P/P | S/S | R/R | I/I | Q/Q | P/P | ON149649   |
| 93.  | 42 AB       | Banat's White | M   | 4           |                  | G/G | W/W | T/T | G/G | I/I | H/H | N/N | R/R | R/R | P/P | S/S | R/R | I/I | Q/Q | P/P | ON149650   |
| 94.  | 43 AB       | Banat's White | F   | 1           | Yes              | G/G | W/W | T/T | G/G | I/I | H/H | N/N | R/R | R/R | P/P | S/S | R/R | I/I | K/K | P/P | ON149651   |
| 95.  | 44 AB       | Banat's White | M   | 7           | Yes              | G/G | W/W | T/T | G/G | I/I | H/H | N/N | R/R | R/R | P/P | S/S | R/R | I/I | K/K | P/P | ON149652   |
| 96.  | 45 AB       | Banat's White | F   | 1           |                  | G/G | W/W | T/T | G/G | I/I | H/H | N/N | R/R | R/R | P/P | S/S | R/R | I/I | Q/Q | P/P | ON149653   |
| 97.  | 46 AB       | Banat's White | F   | 2           | Yes              | G/G | W/W | T/T | G/G | I/I | H/H | N/N | R/R | R/R | P/P | S/S | R/R | I/I | Q/Q | P/P | ON149654   |
| 98.  | 47 AB       | Banat's White | F   | 2           |                  | G/G | W/W | T/T | G/G | I/I | H/H | N/N | R/R | R/R | P/P | S/S | R/R | I/I | Q/Q | P/P | ON149655   |
| 99.  | 48 AB       | Banat's White | F   | 7           |                  | G/G | W/W | T/T | G/G | I/I | H/H | N/N | R/R | R/R | P/P | S/S | R/R | I/I | Q/Q | P/P | ON149656   |
| 100. | 49 AB       | Banat's White | F   | 1           | Yes              | G/G | W/W | T/T | G/G | I/I | H/H | N/N | R/R | R/R | P/P | S/S | R/R | I/I | Q/Q | P/P | ON149657   |

| #    | Code number | Breed         | Sex | Age (years) | Silent mutations | 37  | 102 | 110 | 127 | 142 | 143 | 146 | 151 | 154 | 168 | 173 | 211 | 218 | 222 | 240 | GenBank ID |
|------|-------------|---------------|-----|-------------|------------------|-----|-----|-----|-----|-----|-----|-----|-----|-----|-----|-----|-----|-----|-----|-----|------------|
| 101. | 50 AB       | Banat's White | F   | 7           |                  | G/G | W/W | T/T | G/G | I/I | H/H | N/N | R/R | R/R | P/P | S/S | R/R | I/I | Q/Q | P/P | ON149658   |
| 102. | 51 AB       | Banat's White | F   | 2           | Yes              | G/G | W/W | T/T | G/G | I/I | H/H | N/N | R/R | R/R | P/P | S/S | R/R | I/I | Q/Q | P/P | ON149659   |
| 103. | 52 AB       | Banat's White | F   | 4           |                  | G/G | W/W | T/T | G/G | I/I | H/H | N/N | R/R | R/R | P/P | S/S | R/R | I/I | Q/Q | P/P | ON149660   |
| 104. | 1A          | French Alpine | M   | 4           |                  | G/G | W/W | T/T | G/G | I/I | H/H | N/N | R/R | R/R | P/P | S/S | R/R | I/I | Q/Q | P/S | ON015424   |
| 105. | 2A          | French Alpine | M   | 4           | Yes              | G/G | W/W | P/T | G/G | I/M | H/H | N/N | R/R | R/R | P/P | S/S | R/R | I/I | Q/Q | P/P | ON015425   |
| 106. | 3A          | French Alpine | M   | 4           | Yes              | G/G | W/W | T/T | G/G | I/I | H/H | N/N | R/R | R/R | P/P | S/S | R/R | I/I | Q/Q | S/P | ON015426   |
| 107. | 4A          | French Alpine | M   | 4           |                  | G/G | W/W | T/T | G/G | I/I | H/H | N/N | R/R | R/R | P/P | S/S | R/R | I/I | Q/Q | P/P | ON015427   |
| 108. | 5A          | French Alpine | M   | 4           |                  | G/G | W/W | T/T | G/G | I/M | H/H | N/N | R/R | R/R | P/P | S/S | R/R | I/I | Q/Q | P/P | ON015428   |
| 109. | 1 AF        | French Alpine | F   | 8           | Yes              | G/G | W/W | T/T | G/G | I/I | H/H | N/N | R/R | R/R | P/P | S/S | R/R | I/I | Q/Q | S/P | ON015429   |
| 110. | 7 AF        | French Alpine | F   | 2           | Yes              | G/G | W/W | T/T | G/G | I/I | H/H | N/N | R/R | R/R | P/P | S/S | R/R | I/I | Q/Q | S/P | ON015430   |
| 111. | 8 AF        | French Alpine | F   | 2           |                  | G/G | W/W | T/T | G/G | I/I | H/H | N/N | R/R | R/R | P/P | S/S | R/R | I/I | K/K | S/S | ON015431   |
| 112. | 9 AF        | French Alpine | F   | 3           |                  | G/G | W/W | T/T | G/G | I/I | H/H | N/N | R/R | R/R | P/P | S/S | R/R | I/I | Q/Q | P/P | ON015432   |
| 113. | 12 AF       | French Alpine | F   | 1           | Yes              | G/G | W/W | T/T | G/G | I/I | H/H | N/N | R/R | R/R | P/P | S/S | R/R | I/I | Q/Q | S/P | ON015433   |
| 114. | 14 AF       | French Alpine | F   | 2           |                  | G/G | W/W | T/T | G/G | I/I | H/H | N/N | R/R | R/R | P/P | S/S | R/R | I/I | Q/Q | S/S | ON015434   |
| 115. | 16 AF       | French Alpine | F   | 5           | Yes              | G/G | W/W | T/T | G/G | I/I | H/H | N/N | R/R | R/R | P/P | S/S | R/R | I/I | Q/Q | S/P | ON015435   |
| 116. | 17 AF       | French Alpine | F   | 7           | Yes              | G/G | W/W | T/T | G/G | I/I | H/H | N/N | R/R | R/R | P/P | S/S | R/R | I/I | Q/Q | S/P | ON015436   |

| #    | Code number | Breed         | Sex | Age (years) | Silent mutations | 37  | 102 | 110 | 127 | 142 | 143 | 146 | 151 | 154 | 168 | 173 | 211 | 218 | 222 | 240 | GenBank ID |
|------|-------------|---------------|-----|-------------|------------------|-----|-----|-----|-----|-----|-----|-----|-----|-----|-----|-----|-----|-----|-----|-----|------------|
| 117. | 21 AF       | French Alpine | F   | 3           | Yes              | G/G | W/W | T/T | G/G | I/I | H/H | N/N | R/R | R/R | P/P | S/S | R/R | I/I | Q/Q | S/P | ON015437   |
| 118. | 22 AF       | French Alpine | F   | 3           |                  | G/G | W/W | T/T | G/G | I/I | H/H | N/N | R/R | R/R | P/P | S/S | R/R | I/I | K/K | S/S | ON015438   |
| 119. | 23 AF       | French Alpine | F   | 3           |                  | G/G | W/W | T/T | G/G | I/I | H/H | N/N | R/R | R/R | P/P | S/S | R/R | I/I | K/K | S/S | ON015439   |
| 120. | 24 AF       | French Alpine | F   | 2           | Yes              | G/G | W/W | T/T | G/G | I/I | H/H | N/N | R/R | R/R | P/P | S/S | R/R | I/I | Q/Q | S/P | ON015440   |
| 121. | 25 AF       | French Alpine | F   | 2           | Yes              | G/G | W/W | T/T | G/G | I/I | H/H | N/N | R/R | R/R | P/P | S/S | R/R | I/I | K/K | S/P | ON015442   |
| 122. | 26 AF       | French Alpine | F   | 3           |                  | G/G | W/W | T/T | G/G | I/I | H/H | N/N | R/R | R/R | P/P | S/S | R/R | I/I | Q/Q | S/S | ON015443   |
| 123. | 27 AF       | French Alpine | F   | 2           | Yes              | G/G | W/W | T/T | G/G | I/I | H/H | N/N | R/R | R/R | P/P | S/S | R/R | I/I | Q/Q | P/P | ON015444   |
| 124. | 28 AF       | French Alpine | F   | 1           |                  | G/G | W/W | T/T | G/G | I/I | H/H | N/N | R/R | R/R | P/P | S/S | R/R | I/I | Q/Q | S/S | ON015445   |
| 125. | 29 AF       | French Alpine | F   | 3           | Yes              | G/G | W/W | T/T | G/G | I/I | H/H | N/N | R/R | R/R | P/P | S/S | R/R | I/I | Q/Q | P/P | ON015446   |
| 126. | 30 AF       | French Alpine | F   | 3           | Yes              | G/G | W/W | T/T | G/G | I/I | H/H | N/N | R/R | R/R | P/P | S/S | R/R | I/I | K/K | S/P | ON015447   |
| 127. | 31 AF       | French Alpine | F   | 2           |                  | G/G | W/W | T/T | G/G | I/I | H/H | N/N | R/R | R/R | P/P | S/S | R/R | I/I | Q/Q | P/P | ON084821   |
| 128. | 32 AF       | French Alpine | F   | 3           | Yes              | G/G | W/W | T/T | G/G | I/I | H/H | N/N | R/R | R/R | P/P | S/S | R/R | I/I | Q/Q | P/P | ON084822   |
| 129. | 33 AF       | French Alpine | F   | 2           |                  | G/G | W/W | T/T | G/G | I/I | H/H | N/N | R/R | R/R | P/P | S/S | R/R | I/I | K/K | S/S | ON084823   |
| 130. | 34 AF       | French Alpine | F   | 3           |                  | G/G | W/W | T/T | G/G | I/I | H/H | N/N | R/R | R/R | P/P | S/S | R/R | I/I | Q/Q | P/P | ON084824   |
| 131. | 35 AF       | French Alpine | F   | 4           | Yes              | G/G | W/W | T/T | G/G | I/I | H/H | N/N | R/R | R/R | P/P | S/S | Q/R | I/I | Q/Q | S/P | ON084825   |
| 132. | 36 AF       | French Alpine | F   | 7           | Yes              | G/G | W/W | T/T | G/G | I/I | H/H | N/N | R/R | R/R | P/P | S/S | R/R | I/I | Q/Q | P/P | ON084826   |

| #    | Code number | Breed         | Sex | Age (years) | Silent mutations | 37  | 102 | 110 | 127 | 142 | 143 | 146 | 151 | 154 | 168 | 173 | 211 | 218 | 222 | 240 | GenBank ID |
|------|-------------|---------------|-----|-------------|------------------|-----|-----|-----|-----|-----|-----|-----|-----|-----|-----|-----|-----|-----|-----|-----|------------|
| 133. | 37 AF       | French Alpine | F   | 4           | Yes              | G/G | W/W | T/T | G/G | I/I | H/H | N/N | R/R | R/R | P/P | S/S | R/R | I/I | Q/Q | P/P | ON084827   |
| 134. | 38 AF       | French Alpine | F   | 4           |                  | G/G | W/W | T/T | G/G | I/I | H/H | N/N | R/R | R/R | P/P | S/S | R/R | I/I | Q/Q | S/S | ON084828   |
| 135. | 39 AF       | French Alpine | F   | 4           | Yes              | G/G | W/W | T/T | G/G | I/I | H/H | N/N | R/R | R/R | P/P | S/S | Q/R | I/I | H/Q | S/P | OM988075   |
| 136. | 40 AF       | French Alpine | F   | 4           | Yes              | G/G | W/W | T/T | G/G | I/I | H/H | N/N | R/R | R/R | P/P | S/S | R/R | I/I | Q/Q | P/P | ON084829   |
| 137. | 41 AF       | French Alpine | F   | 2           |                  | G/G | W/W | T/T | G/G | I/I | H/H | N/N | R/R | R/R | P/P | S/S | R/R | I/I | Q/Q | P/P | ON084830   |
| 138. | 42 AF       | French Alpine | F   | 2           | Yes              | G/G | W/W | T/T | G/G | I/I | H/H | N/N | R/R | R/R | P/P | S/S | R/R | I/I | Q/Q | P/P | ON084831   |
| 139. | 43 AF       | French Alpine | F   | 2           |                  | G/G | W/W | T/T | G/G | I/I | H/H | N/N | R/R | R/R | P/P | S/S | R/R | I/I | Q/Q | P/P | ON084832   |
| 140. | 44 AF       | French Alpine | F   | 3           |                  | G/G | W/W | T/T | G/G | I/M | H/H | N/N | R/R | R/R | P/P | S/S | R/R | I/I | Q/Q | P/P | ON084833   |
| 141. | 45 AF       | French Alpine | F   | 2           | Yes              | G/G | W/W | T/T | G/G | I/I | H/H | N/N | R/R | R/R | P/P | S/S | R/R | I/I | K/K | P/P | ON084834   |
| 142. | 46 AF       | French Alpine | F   | 2           |                  | G/G | W/W | T/T | G/G | I/M | H/H | N/N | R/R | R/R | P/P | S/S | R/R | I/I | Q/Q | P/P | ON084835   |
| 143. | 47 AF       | French Alpine | F   | 2           |                  | G/G | W/W | T/T | G/G | I/I | H/H | N/N | R/R | R/R | P/P | S/S | Q/R | I/I | Q/Q | S/P | ON084836   |
| 144. | 48 AF       | French Alpine | F   | 4           |                  | G/G | W/W | T/T | G/G | I/M | H/H | N/N | R/R | H/R | P/P | S/S | R/R | I/I | Q/Q | S/P | ON084837   |
| 145. | 49 AF       | French Alpine | F   | 6           |                  | G/G | W/W | T/T | G/G | I/I | H/H | N/N | R/R | R/R | P/P | S/S | R/R | I/I | Q/Q | P/P | ON084838   |
| 146. | 50 AF       | French Alpine | F   | 6           |                  | G/G | W/W | T/T | G/G | I/I | H/H | N/N | R/R | R/R | P/P | S/S | R/R | I/I | Q/Q | P/P | ON084839   |
| 147. | 51 AF       | French Alpine | M   | 1           |                  | G/G | W/W | T/T | G/G | I/I | H/H | N/N | R/R | R/R | P/P | S/S | R/R | I/I | Q/Q | P/P | ON084840   |
| 148. | 52 AF       | French Alpine | M   | 1           |                  | G/G | W/W | T/T | G/G | I/I | H/H | N/N | R/R | R/R | P/P | S/S | R/R | I/I | Q/Q | S/S | ON084841   |



| #    | Code number | Breed         | Sex | Age (years) | Silent mutations | 37  | 102 | 110 | 127 | 142 | 143 | 146 | 151 | 154 | 168 | 173 | 211 | 218 | 222 | 240 | GenBank ID |
|------|-------------|---------------|-----|-------------|------------------|-----|-----|-----|-----|-----|-----|-----|-----|-----|-----|-----|-----|-----|-----|-----|------------|
| 149. | 53 AF       | French Alpine | M   | 1           |                  | G/G | W/W | T/T | G/G | I/I | H/H | N/N | R/R | R/R | P/P | S/S | R/R | I/I | Q/Q | P/P | ON084842   |
| 150. | 54 AF       | French Alpine | M   | 1           |                  | G/G | W/W | T/T | G/G | I/I | H/H | N/N | R/R | R/R | P/P | S/S | R/R | I/I | Q/Q | P/P | ON084843   |
| 151. | 55 AF       | French Alpine | M   | 1           |                  | G/G | W/W | T/T | G/G | I/I | H/H | N/N | R/R | R/R | P/P | S/S | R/R | I/I | Q/Q | P/P | ON084844   |
| 152. | 56 AF       | French Alpine | M   | 1           |                  | G/G | W/W | T/T | G/G | I/I | H/H | N/N | R/R | R/R | P/P | S/S | R/R | I/I | Q/Q | P/P | ON084845   |
| 153. | 57 AF       | French Alpine | M   | 1           |                  | G/G | W/W | T/T | G/G | I/I | H/H | N/N | R/R | R/R | P/P | S/S | R/R | I/I | Q/Q | P/S | ON084846   |
| 154. | 58 AF       | French Alpine | M   | 1           | Yes              | G/G | W/W | T/T | G/G | I/I | H/H | N/N | R/R | R/R | P/P | S/S | R/R | I/I | K/K | S/P | ON084847   |
| 155. | 59 AF       | French Alpine | M   | 1           | Yes              | G/G | W/W | T/T | G/G | I/I | H/H | N/N | R/R | R/R | P/P | S/S | R/R | I/I | Q/Q | P/P | ON084848   |
| 156. | 60 AF       | French Alpine | M   | 1           |                  | G/G | W/W | T/T | G/G | I/I | H/H | N/N | R/R | R/R | P/P | S/S | R/R | I/I | Q/Q | S/S | ON084849   |
